# Supplementary material for: Muscle growth differences in Lijiang pigs revealed by ATAC-seq multi-omics
Source: Frontiers journal article supplement (doi:10.3389/fvets.2024.1431248), 2024-08-26
Supplement: Data_Sheet_1.zip [file Data_Sheet_1.zip]

## Sheet: ATAC-seq-genes
Differential genes screened by ATAC-seq		RNA-seq screening for differential genes		Genes obtained by overlapping Windows and OCRs with significant genetic differentiation in genomic data		Proteomic and transcriptomic screens for all overlapping differential genes
ENSSSCG00000000006		ENSSSCG00000011076		ENSSSCG00000000475		ENSSSCG00000001427
ENSSSCG00000000078		ENSSSCG00000055218		ENSSSCG00000000567		ENSSSCG00000001549
ENSSSCG00000000890		ENSSSCG00000031728		ENSSSCG00000003098		ENSSSCG00000001804
ENSSSCG00000000983		ENSSSCG00000002383		ENSSSCG00000003103		ENSSSCG00000003144
ENSSSCG00000001549		ENSSSCG00000036331		ENSSSCG00000003104		ENSSSCG00000005055
ENSSSCG00000001770		ENSSSCG00000030113		ENSSSCG00000003253		ENSSSCG00000005997
ENSSSCG00000001863		ENSSSCG00000015541		ENSSSCG00000003256		ENSSSCG00000008397
ENSSSCG00000002714		ENSSSCG00000038048		ENSSSCG00000003257		ENSSSCG00000008980
ENSSSCG00000002724		ENSSSCG00000028777		ENSSSCG00000003269		ENSSSCG00000009138
ENSSSCG00000002764		ENSSSCG00000036060		ENSSSCG00000003271		ENSSSCG00000009364
ENSSSCG00000003388		ENSSSCG00000015545		ENSSSCG00000003322		ENSSSCG00000010829
ENSSSCG00000003479		ENSSSCG00000031912		ENSSSCG00000003532		ENSSSCG00000011848
ENSSSCG00000003554		ENSSSCG00000032782		ENSSSCG00000004270		ENSSSCG00000015270
ENSSSCG00000004012		ENSSSCG00000047720		ENSSSCG00000004351		ENSSSCG00000015353
ENSSSCG00000004576		ENSSSCG00000012427		ENSSSCG00000004353		ENSSSCG00000015545
ENSSSCG00000005608		ENSSSCG00000029199		ENSSSCG00000004537		ENSSSCG00000017521
ENSSSCG00000006757		ENSSSCG00000032115		ENSSSCG00000004538		ENSSSCG00000021084
ENSSSCG00000006983		ENSSSCG00000001804		ENSSSCG00000004583		ENSSSCG00000022404
ENSSSCG00000007100		ENSSSCG00000028277		ENSSSCG00000004823		ENSSSCG00000027013
ENSSSCG00000007586		ENSSSCG00000015120		ENSSSCG00000004934		ENSSSCG00000029070
ENSSSCG00000007639		ENSSSCG00000014156		ENSSSCG00000004989		ENSSSCG00000031163
ENSSSCG00000007723		ENSSSCG00000043175		ENSSSCG00000005020		ENSSSCG00000032782
ENSSSCG00000008691		ENSSSCG00000013397		ENSSSCG00000005021		ENSSSCG00000037565
ENSSSCG00000008698		ENSSSCG00000009364		ENSSSCG00000005169		ENSSSCG00000038475
ENSSSCG00000008758		ENSSSCG00000032662		ENSSSCG00000005170		ENSSSCG00000063387
ENSSSCG00000008772		ENSSSCG00000031321		ENSSSCG00000005182		ENSSSCG00000063428
ENSSSCG00000008823		ENSSSCG00000008980		ENSSSCG00000005184
ENSSSCG00000008980		ENSSSCG00000009616		ENSSSCG00000005186
ENSSSCG00000010475		ENSSSCG00000024385		ENSSSCG00000005343
ENSSSCG00000010639		ENSSSCG00000036570		ENSSSCG00000006305
ENSSSCG00000011075		ENSSSCG00000016448		ENSSSCG00000006310
ENSSSCG00000012992		ENSSSCG00000056766		ENSSSCG00000006947
ENSSSCG00000013073		ENSSSCG00000036007		ENSSSCG00000007458
ENSSSCG00000013270		ENSSSCG00000047083		ENSSSCG00000007942
ENSSSCG00000013311		ENSSSCG00000006218		ENSSSCG00000007943
ENSSSCG00000014178		ENSSSCG00000002696		ENSSSCG00000007979
ENSSSCG00000014787		ENSSSCG00000032301		ENSSSCG00000008012
ENSSSCG00000015380		ENSSSCG00000009138		ENSSSCG00000008029
ENSSSCG00000015556		ENSSSCG00000063428		ENSSSCG00000008030
ENSSSCG00000015795		ENSSSCG00000038727		ENSSSCG00000008031
ENSSSCG00000015996		ENSSSCG00000011810		ENSSSCG00000008032
ENSSSCG00000016426		ENSSSCG00000023585		ENSSSCG00000008467
ENSSSCG00000016577		ENSSSCG00000055438		ENSSSCG00000008496
ENSSSCG00000016929		ENSSSCG00000021038		ENSSSCG00000008849
ENSSSCG00000017325		ENSSSCG00000008844		ENSSSCG00000013492
ENSSSCG00000018056		ENSSSCG00000006940		ENSSSCG00000013534
ENSSSCG00000020205		ENSSSCG00000011171		ENSSSCG00000013595
ENSSSCG00000020227		ENSSSCG00000028720		ENSSSCG00000013613
ENSSSCG00000020469		ENSSSCG00000031053		ENSSSCG00000013615
ENSSSCG00000021118		ENSSSCG00000017257		ENSSSCG00000013616
ENSSSCG00000021200		ENSSSCG00000029606		ENSSSCG00000013617
ENSSSCG00000021383		ENSSSCG00000003148		ENSSSCG00000013618
ENSSSCG00000021646		ENSSSCG00000013375		ENSSSCG00000013625
ENSSSCG00000022306		ENSSSCG00000016793		ENSSSCG00000013627
ENSSSCG00000023144		ENSSSCG00000063387		ENSSSCG00000013633
ENSSSCG00000024238		ENSSSCG00000031888		ENSSSCG00000013754
ENSSSCG00000024747		ENSSSCG00000035650		ENSSSCG00000013876
ENSSSCG00000025049		ENSSSCG00000038500		ENSSSCG00000013888
ENSSSCG00000025582		ENSSSCG00000062725		ENSSSCG00000013889
ENSSSCG00000025768		ENSSSCG00000034345		ENSSSCG00000013978
ENSSSCG00000026533		ENSSSCG00000003766		ENSSSCG00000014047
ENSSSCG00000026662		ENSSSCG00000036136		ENSSSCG00000014073
ENSSSCG00000026719		ENSSSCG00000038475		ENSSSCG00000014161
ENSSSCG00000027288		ENSSSCG00000045539		ENSSSCG00000014168
ENSSSCG00000027503		ENSSSCG00000036224		ENSSSCG00000014337
ENSSSCG00000028777		ENSSSCG00000006328		ENSSSCG00000015878
ENSSSCG00000029160		ENSSSCG00000014037		ENSSSCG00000015892
ENSSSCG00000031547		ENSSSCG00000010831		ENSSSCG00000015893
ENSSSCG00000032525		ENSSSCG00000017983		ENSSSCG00000016042
ENSSSCG00000033160		ENSSSCG00000032950		ENSSSCG00000016043
ENSSSCG00000033707		ENSSSCG00000014119		ENSSSCG00000016110
ENSSSCG00000033814		ENSSSCG00000009889		ENSSSCG00000020845
ENSSSCG00000036835		ENSSSCG00000039823		ENSSSCG00000022545
ENSSSCG00000037381		ENSSSCG00000034493		ENSSSCG00000022569
ENSSSCG00000037882		ENSSSCG00000003400		ENSSSCG00000022671
ENSSSCG00000038664		ENSSSCG00000027646		ENSSSCG00000022963
ENSSSCG00000040486		ENSSSCG00000052944		ENSSSCG00000022989
ENSSSCG00000040621		ENSSSCG00000025698		ENSSSCG00000023396
ENSSSCG00000040729		ENSSSCG00000010829		ENSSSCG00000025532
ENSSSCG00000041410		ENSSSCG00000047367		ENSSSCG00000025711
ENSSSCG00000041502		ENSSSCG00000031163		ENSSSCG00000025900
ENSSSCG00000041566		ENSSSCG00000005997		ENSSSCG00000026152
ENSSSCG00000041705		ENSSSCG00000037808		ENSSSCG00000026960
ENSSSCG00000041810		ENSSSCG00000039972		ENSSSCG00000027002
ENSSSCG00000042197		ENSSSCG00000038374		ENSSSCG00000027417
ENSSSCG00000042641		ENSSSCG00000009631		ENSSSCG00000027608
ENSSSCG00000042719		ENSSSCG00000059472		ENSSSCG00000028771
ENSSSCG00000042888		ENSSSCG00000016956		ENSSSCG00000029960
ENSSSCG00000043514		ENSSSCG00000017238		ENSSSCG00000030351
ENSSSCG00000044687		ENSSSCG00000035400		ENSSSCG00000030361
ENSSSCG00000045186		ENSSSCG00000023031		ENSSSCG00000030685
ENSSSCG00000046141		ENSSSCG00000027777		ENSSSCG00000030857
ENSSSCG00000048033		ENSSSCG00000022842		ENSSSCG00000031469
ENSSSCG00000048267		ENSSSCG00000022404		ENSSSCG00000031793
ENSSSCG00000048333		ENSSSCG00000022099		ENSSSCG00000032086
ENSSSCG00000048711		ENSSSCG00000024310		ENSSSCG00000033168
ENSSSCG00000049660		ENSSSCG00000016002		ENSSSCG00000033836
ENSSSCG00000049753		ENSSSCG00000028712		ENSSSCG00000034266
ENSSSCG00000051265		ENSSSCG00000029886		ENSSSCG00000035284
ENSSSCG00000051779		ENSSSCG00000026812		ENSSSCG00000035337
ENSSSCG00000052416		ENSSSCG00000000975		ENSSSCG00000035374
ENSSSCG00000052860		ENSSSCG00000017934		ENSSSCG00000035706
ENSSSCG00000053468		ENSSSCG00000027013		ENSSSCG00000035833
ENSSSCG00000054218		ENSSSCG00000013614		ENSSSCG00000036537
ENSSSCG00000054525		ENSSSCG00000000890		ENSSSCG00000036893
ENSSSCG00000054670		ENSSSCG00000002279		ENSSSCG00000037146
ENSSSCG00000054888		ENSSSCG00000021204		ENSSSCG00000037494
ENSSSCG00000055224		ENSSSCG00000016338		ENSSSCG00000037594
ENSSSCG00000055399		ENSSSCG00000035727		ENSSSCG00000038025
ENSSSCG00000055405		ENSSSCG00000058656		ENSSSCG00000038804
ENSSSCG00000055627		ENSSSCG00000026527		ENSSSCG00000039436
ENSSSCG00000056307		ENSSSCG00000050540		ENSSSCG00000039663
ENSSSCG00000056351		ENSSSCG00000013259		ENSSSCG00000039922
ENSSSCG00000056867		ENSSSCG00000016200		ENSSSCG00000040016
ENSSSCG00000057254		ENSSSCG00000010533		ENSSSCG00000040366
ENSSSCG00000057416		ENSSSCG00000003155		ENSSSCG00000040603
ENSSSCG00000057969		ENSSSCG00000010464		ENSSSCG00000041042
ENSSSCG00000057975		ENSSSCG00000012029		ENSSSCG00000042787
ENSSSCG00000059093		ENSSSCG00000009605		ENSSSCG00000043529
ENSSSCG00000059783		ENSSSCG00000020879		ENSSSCG00000045953
ENSSSCG00000059785		ENSSSCG00000002039		ENSSSCG00000048636
ENSSSCG00000061279		ENSSSCG00000011848		ENSSSCG00000050274
ENSSSCG00000061547		ENSSSCG00000051861		ENSSSCG00000050577
ENSSSCG00000061878		ENSSSCG00000034356		ENSSSCG00000050732
ENSSSCG00000062096		ENSSSCG00000055905		ENSSSCG00000051991
ENSSSCG00000062724		ENSSSCG00000001863		ENSSSCG00000053116
		ENSSSCG00000025188		ENSSSCG00000053803
		ENSSSCG00000034853		ENSSSCG00000054437
		ENSSSCG00000028149		ENSSSCG00000054855
		ENSSSCG00000039962		ENSSSCG00000054934
		ENSSSCG00000010476		ENSSSCG00000056237
		ENSSSCG00000004012		ENSSSCG00000057046
		ENSSSCG00000015937		ENSSSCG00000057842
		ENSSSCG00000034740		ENSSSCG00000060066
		ENSSSCG00000022849		ENSSSCG00000061076
		ENSSSCG00000037025		ENSSSCG00000061381
		ENSSSCG00000062696		ENSSSCG00000062085
		ENSSSCG00000042027		ENSSSCG00000062827
		ENSSSCG00000038162		ENSSSCG00000063467
		ENSSSCG00000004164		ENSSSCG00000063476
		ENSSSCG00000005297
		ENSSSCG00000021084
		ENSSSCG00000036114
		ENSSSCG00000032715
		ENSSSCG00000004154
		ENSSSCG00000010169
		ENSSSCG00000008397
		ENSSSCG00000058492
		ENSSSCG00000007914
		ENSSSCG00000005055
		ENSSSCG00000016111
		ENSSSCG00000022895
		ENSSSCG00000058028
		ENSSSCG00000024162
		ENSSSCG00000052306
		ENSSSCG00000038036
		ENSSSCG00000003144
		ENSSSCG00000005449
		ENSSSCG00000026931
		ENSSSCG00000003088
		ENSSSCG00000009361
		ENSSSCG00000037399
		ENSSSCG00000006335
		ENSSSCG00000016958
		ENSSSCG00000001063
		ENSSSCG00000035736
		ENSSSCG00000025788
		ENSSSCG00000012480
		ENSSSCG00000030581
		ENSSSCG00000025876
		ENSSSCG00000009477
		ENSSSCG00000010209
		ENSSSCG00000005965
		ENSSSCG00000006857
		ENSSSCG00000060530
		ENSSSCG00000017521
		ENSSSCG00000000917
		ENSSSCG00000010639
		ENSSSCG00000028101
		ENSSSCG00000037557
		ENSSSCG00000005944
		ENSSSCG00000013896
		ENSSSCG00000006289
		ENSSSCG00000017306
		ENSSSCG00000036553
		ENSSSCG00000015270
		ENSSSCG00000037565
		ENSSSCG00000004980
		ENSSSCG00000058221
		ENSSSCG00000014580
		ENSSSCG00000031831
		ENSSSCG00000015009
		ENSSSCG00000013735
		ENSSSCG00000053280
		ENSSSCG00000026731
		ENSSSCG00000031776
		ENSSSCG00000012160
		ENSSSCG00000024973
		ENSSSCG00000011176
		ENSSSCG00000011186
		ENSSSCG00000016076
		ENSSSCG00000052246
		ENSSSCG00000033745
		ENSSSCG00000009379
		ENSSSCG00000015299
		ENSSSCG00000032964
		ENSSSCG00000035074
		ENSSSCG00000058083
		ENSSSCG00000015618
		ENSSSCG00000058915
		ENSSSCG00000028572
		ENSSSCG00000006729
		ENSSSCG00000006243
		ENSSSCG00000003729
		ENSSSCG00000004602
		ENSSSCG00000006172
		ENSSSCG00000015785
		ENSSSCG00000002697
		ENSSSCG00000047029
		ENSSSCG00000022247
		ENSSSCG00000002142
		ENSSSCG00000010974
		ENSSSCG00000014933
		ENSSSCG00000007350
		ENSSSCG00000036049
		ENSSSCG00000004829
		ENSSSCG00000001025
		ENSSSCG00000000455
		ENSSSCG00000015015
		ENSSSCG00000027030
		ENSSSCG00000023377
		ENSSSCG00000002392
		ENSSSCG00000032624
		ENSSSCG00000047786
		ENSSSCG00000015595
		ENSSSCG00000014997
		ENSSSCG00000026427
		ENSSSCG00000038521
		ENSSSCG00000029070
		ENSSSCG00000055760
		ENSSSCG00000006506
		ENSSSCG00000051497
		ENSSSCG00000014830
		ENSSSCG00000041409
		ENSSSCG00000056139
		ENSSSCG00000032113
		ENSSSCG00000012730
		ENSSSCG00000001422
		ENSSSCG00000026211
		ENSSSCG00000033703
		ENSSSCG00000007336
		ENSSSCG00000002252
		ENSSSCG00000026894
		ENSSSCG00000025777
		ENSSSCG00000035937
		ENSSSCG00000061402
		ENSSSCG00000043917
		ENSSSCG00000015048
		ENSSSCG00000004302
		ENSSSCG00000005045
		ENSSSCG00000004966
		ENSSSCG00000039188
		ENSSSCG00000062483
		ENSSSCG00000049571
		ENSSSCG00000004215
		ENSSSCG00000036480
		ENSSSCG00000004071
		ENSSSCG00000012792
		ENSSSCG00000014823
		ENSSSCG00000023045
		ENSSSCG00000006290
		ENSSSCG00000024174
		ENSSSCG00000007083
		ENSSSCG00000009144
		ENSSSCG00000045079
		ENSSSCG00000051894
		ENSSSCG00000036403
		ENSSSCG00000001427
		ENSSSCG00000032474
		ENSSSCG00000032436
		ENSSSCG00000013579
		ENSSSCG00000012482
		ENSSSCG00000030277
		ENSSSCG00000001931
		ENSSSCG00000006157
		ENSSSCG00000006578
		ENSSSCG00000006312
		ENSSSCG00000051286
		ENSSSCG00000036538
		ENSSSCG00000029304
		ENSSSCG00000022402
		ENSSSCG00000014436
		ENSSSCG00000052381
		ENSSSCG00000038966
		ENSSSCG00000031361
		ENSSSCG00000062190
		ENSSSCG00000022891
		ENSSSCG00000022492
		ENSSSCG00000027628
		ENSSSCG00000062085
		ENSSSCG00000055651
		ENSSSCG00000032320
		ENSSSCG00000059680
		ENSSSCG00000014250
		ENSSSCG00000022250
		ENSSSCG00000022347
		ENSSSCG00000008983
		ENSSSCG00000011264
		ENSSSCG00000014232
		ENSSSCG00000030165
		ENSSSCG00000014011
		ENSSSCG00000004244
		ENSSSCG00000040579
		ENSSSCG00000035421
		ENSSSCG00000031771
		ENSSSCG00000034887
		ENSSSCG00000043301
		ENSSSCG00000035037
		ENSSSCG00000056580
		ENSSSCG00000002831
		ENSSSCG00000008307
		ENSSSCG00000008664
		ENSSSCG00000000419
		ENSSSCG00000038184
		ENSSSCG00000058076
		ENSSSCG00000038326
		ENSSSCG00000006524
		ENSSSCG00000042862
		ENSSSCG00000041477
		ENSSSCG00000059775
		ENSSSCG00000009166
		ENSSSCG00000026430
		ENSSSCG00000033001
		ENSSSCG00000007909
		ENSSSCG00000040581
		ENSSSCG00000027046
		ENSSSCG00000030694
		ENSSSCG00000013350
		ENSSSCG00000040550
		ENSSSCG00000013393
		ENSSSCG00000014418
		ENSSSCG00000053662
		ENSSSCG00000011002
		ENSSSCG00000031476
		ENSSSCG00000057268
		ENSSSCG00000023178
		ENSSSCG00000038904
		ENSSSCG00000022968
		ENSSSCG00000027745
		ENSSSCG00000026886
		ENSSSCG00000029300
		ENSSSCG00000000029
		ENSSSCG00000050978
		ENSSSCG00000036516
		ENSSSCG00000003527
		ENSSSCG00000017518
		ENSSSCG00000008919
		ENSSSCG00000010832
		ENSSSCG00000033919
		ENSSSCG00000036036
		ENSSSCG00000015924
		ENSSSCG00000037652
		ENSSSCG00000061310
		ENSSSCG00000015353
		ENSSSCG00000011524
		ENSSSCG00000052609
		ENSSSCG00000010170
		ENSSSCG00000040464
		ENSSSCG00000003687
		ENSSSCG00000054936
		ENSSSCG00000004485
		ENSSSCG00000040746
		ENSSSCG00000012121
		ENSSSCG00000016997
		ENSSSCG00000055703
		ENSSSCG00000035078
		ENSSSCG00000035617
		ENSSSCG00000036360
		ENSSSCG00000015897
		ENSSSCG00000060733
		ENSSSCG00000053249
		ENSSSCG00000009152
		ENSSSCG00000013599
		ENSSSCG00000054646
		ENSSSCG00000017862
		ENSSSCG00000004093
		ENSSSCG00000020837
		ENSSSCG00000006105
		ENSSSCG00000032016
		ENSSSCG00000026425
		ENSSSCG00000059852
		ENSSSCG00000057054
		ENSSSCG00000016859
		ENSSSCG00000033383
		ENSSSCG00000009051
		ENSSSCG00000036933
		ENSSSCG00000042004
		ENSSSCG00000032241
		ENSSSCG00000040688
		ENSSSCG00000022933
		ENSSSCG00000014221
		ENSSSCG00000063455
		ENSSSCG00000045084
		ENSSSCG00000029815
		ENSSSCG00000010532
		ENSSSCG00000042370
		ENSSSCG00000063271
		ENSSSCG00000014672
		ENSSSCG00000029260
		ENSSSCG00000044011
		ENSSSCG00000026233
		ENSSSCG00000034284
		ENSSSCG00000038190
		ENSSSCG00000053075
		ENSSSCG00000057372
		ENSSSCG00000012178
		ENSSSCG00000001942
		ENSSSCG00000015893
		ENSSSCG00000060225
		ENSSSCG00000006003
		ENSSSCG00000015403
		ENSSSCG00000010570
		ENSSSCG00000008921
		ENSSSCG00000007754
		ENSSSCG00000025286
		ENSSSCG00000012993
		ENSSSCG00000041180
		ENSSSCG00000034739
		ENSSSCG00000031970
		ENSSSCG00000003351
		ENSSSCG00000011965
		ENSSSCG00000050987
		ENSSSCG00000017533
		ENSSSCG00000032249
		ENSSSCG00000017416
		ENSSSCG00000012315
		ENSSSCG00000041880
		ENSSSCG00000000838
		ENSSSCG00000015589
		ENSSSCG00000053583
		ENSSSCG00000021852
		ENSSSCG00000003080
		ENSSSCG00000027467
		ENSSSCG00000024563
		ENSSSCG00000009202
		ENSSSCG00000017569
		ENSSSCG00000032422
		ENSSSCG00000062464
		ENSSSCG00000056309
		ENSSSCG00000060162
		ENSSSCG00000026180
		ENSSSCG00000033606
		ENSSSCG00000014368
		ENSSSCG00000031764
		ENSSSCG00000033926
		ENSSSCG00000014843
		ENSSSCG00000028144
		ENSSSCG00000044335
		ENSSSCG00000008228
		ENSSSCG00000013340
		ENSSSCG00000004433
		ENSSSCG00000016114
		ENSSSCG00000005916
		ENSSSCG00000036314
		ENSSSCG00000042767
		ENSSSCG00000001001
		ENSSSCG00000059553
		ENSSSCG00000000137
		ENSSSCG00000017538
		ENSSSCG00000004954
		ENSSSCG00000038186
		ENSSSCG00000058826
		ENSSSCG00000033506
		ENSSSCG00000015742
		ENSSSCG00000058888
		ENSSSCG00000005465
		ENSSSCG00000027480
		ENSSSCG00000053639
		ENSSSCG00000026533
		ENSSSCG00000013909
		ENSSSCG00000029484
		ENSSSCG00000012110
		ENSSSCG00000039556
		ENSSSCG00000004588
		ENSSSCG00000013865
		ENSSSCG00000035812
		ENSSSCG00000036961
		ENSSSCG00000040715
		ENSSSCG00000003825
		ENSSSCG00000048260
		ENSSSCG00000023525
		ENSSSCG00000033222
		ENSSSCG00000047218
		ENSSSCG00000045953
		ENSSSCG00000014007
		ENSSSCG00000040575
		ENSSSCG00000011077
		ENSSSCG00000022292
		ENSSSCG00000062070
		ENSSSCG00000015089
		ENSSSCG00000001549
		ENSSSCG00000056302
		ENSSSCG00000017299
		ENSSSCG00000032360
		ENSSSCG00000056023
		ENSSSCG00000016676
		ENSSSCG00000056043
		ENSSSCG00000028559
